# Supplementary material for: Performance of Hypotension Prediction Index for Prevention of Hypotension and Results on Biomarkers of Organ Injury and Oxidative Stress During Elective Non-Cardiac Surgery: A Randomized Controlled Trial
Source: Research Square preprint supplement (doi:10.21203/rs.3.rs-851209/v1), 2021-10-08
Supplement: Supplementary file 1 [file 9b783072d13568320f630f36.pdf]

# **EXPERIMENTAL PROTOCOL**

## **Correlation between circulating biomarkers of organs damage and intraoperative hypotension management**

**Principal Investigator:** Paolo Murabito<sup>a</sup>, MD, PhD,

**Co-Investigators:** Marinella Astuto<sup>a</sup>, MD, PhD  
Giovanni Li Volti<sup>b</sup>, MD, PhD

### **ABSTRACT**

Intraoperative hypotension (defined as mean arterial pressure below 65 mmHg) is associated with increased organs dysfunction and mortality. Even short durations of reduced arterial blood pressure episodes significantly increased the risk of myocardial injury, neurological deficits, renal failure, and mortality (1-4). Hypotension rate during surgery is quite common and recent studies showed an incidence up to 60% of patients endured hypotension during anesthesia for an average of 10% of surgical time (5, 6).

Nowadays hypotension seems to be preventable even if current management of the hypotensive episodes is predominantly reactive and rather occurs with some delay. We hypothesize that the prevention of hypotension by means Edwards Lifescience new technology (HPI software) can improve patients outcome after surgery.

The present pilot randomized clinical trial is aimed at investigating various biomarkers involved in organ dysfunction and how they correlate with different intraoperative hypotension management strategies (Invasive blood pressure monitored by a normal arterial line vs Invasive blood pressure monitored by Edwards FloTracIQ system with HPI software).

*a: Department of "Chirurgia Generale e Specialità Medico-Chirurgiche", University of Catania*

*b: Department of "Scienze Biologiche e Biotecnologiche", University of Catania*

In the study will be enrolled forty adult patients requiring an arterial line (at discretion of treating physician) undergoing non-cardiac non-day surgery (with an expected duration of more than 2 hours and an aimed MAP of 65 mmHg) at the "Policlinico Universitario" of Catania.

**Inclusion criteria:**

- Aged 18 years or older;
- Planned for elective non-cardiac non-day surgery with an expected duration of more than 2 hours;
- Planned to receive general anesthesia;
- Planned to receive an arterial line during surgery;
- Aim for MAP of 65 mmHg during surgery;
- Being able to give written informed consent prior to surgery.

**Exclusion criteria**

- Age less than 18 years;
- Aim for MAP other than 65 mmHg at discretion treating physician;
- Significant hypotension before surgery defined as a MAP <65;
- Right- or left sided cardiac failure (e.g. LVEF<35%);
- Known cardiac shunts (significant);
- Known aortic stenosis (severe);
- Severe cardiac arrhythmias including atrial fibrillation;
- Chronic kidney disease (as chronic kidney disease may affect the interpretation and prognostic significance of changes in urinary biomarkers);
- Liver surgery;
- Vascular surgery with clamping of the aorta;
- Diabetes.

The patients will be randomly (1:1) assigned to one of the subsequent two groups: a group monitored with FloTracIQ with HPI software (Treatment Group) and a group with standard invasive blood pressure monitoring (Control Group).

All hypotensive episodes during surgery will be treated according to the following flowcharts (Fig. 1 and Fig. 2):

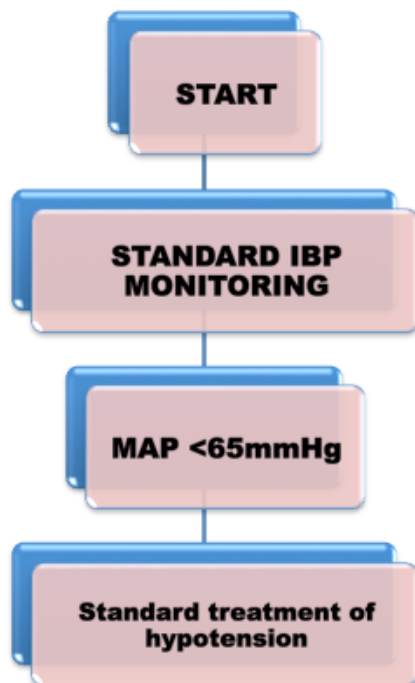

**Figure 1: Treatment of patients of control group**

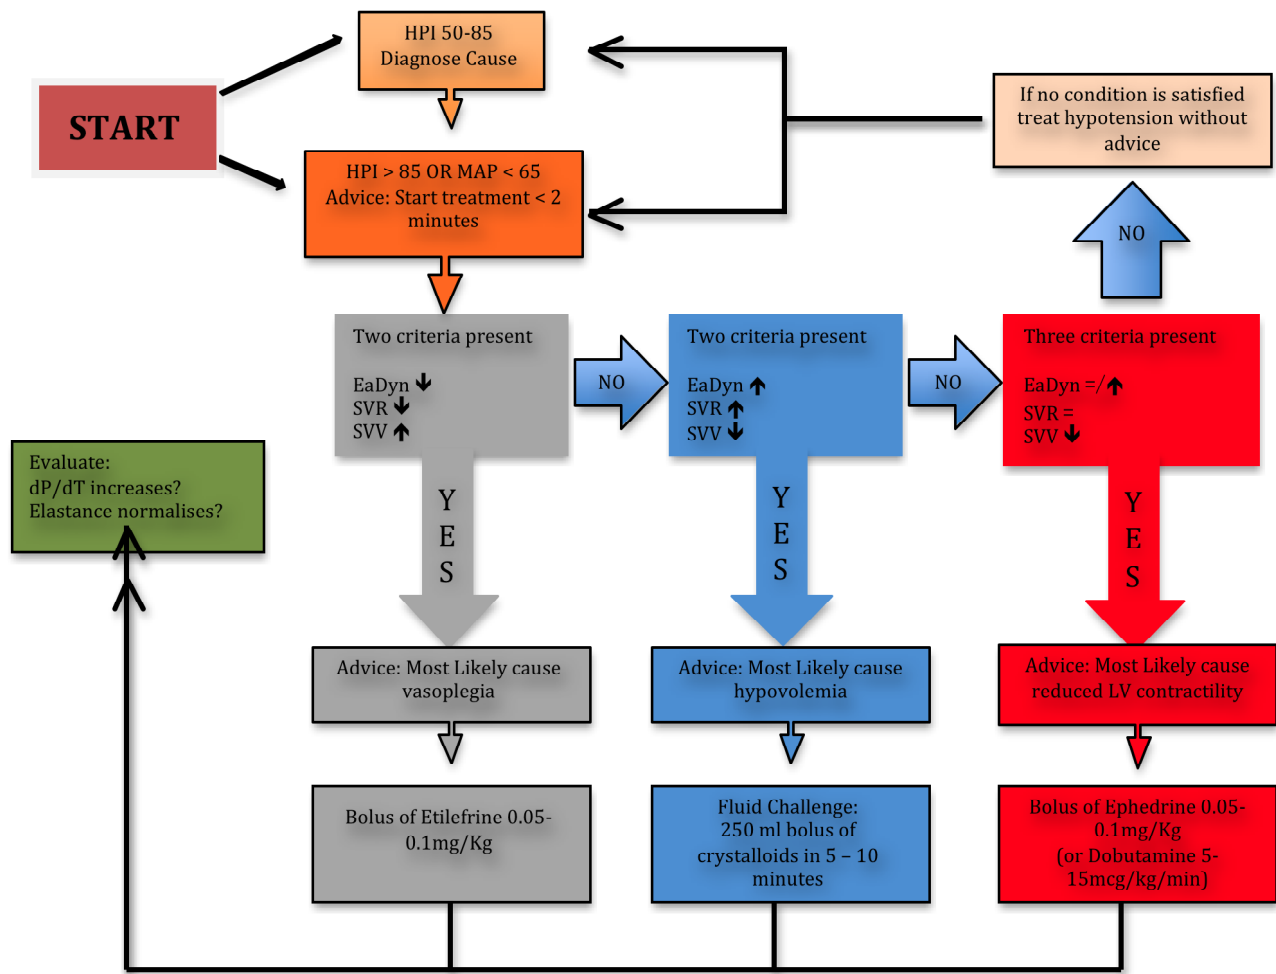

**Figure 2. Treatment of patients of experimental group.**

In both groups different blood samplings will be performed in order to assess biomarkers of specific organ dysfunction: T0 (baseline, before starting operating procedures); T1 (2 hours after starting anesthesia); T2 (at the end of surgical procedures). The following biomarkers will be assessed: neuron specific enolase and S100B (for brain monitoring) (7); high sensitive cardiac Troponine T (for heart monitoring) (8); Neutrophil Gelatinase-Associated Lipocalin (NGAL, for kidney monitoring) (9); circulating endothelial cells counting and cytofluorimetric analysis (for endothelial monitoring) (10). In addition we will also determine systemic effect of intraoperative hypotension as measured by inflammatory cytokynes (IL-6, IL-1 beta and TNF-alfa), oxidative stress (reduced glutathione, lipid hydroperoxides) (11) and markers of hypoxia (HIF1alpha, lactate, acetylCoA, CoA) (11).

Various clinical informations will be collected at the same time: glomerular filtration rate, plasma electrolytes, creatinine, AST, ALT, blood gasses analysis, anion gap.

A telephone interview will be performed one month after surgery, in order to investigate general health condition and any re-admission to hospital.

**Endpoints/Measurements:**

- variation of biomarkers levels from basal (T0);
- incidence of hypotension during surgery;
- time spent in hypotension during surgery;
- patient-reported outcome.

**Sample size calculation:**

Given the pilot nature of the study, no formal justification of sample size has been made.

**Statistical analysis:**

For a test of normal distribution, the Kolmogorov–Smirnov test will be used. Continuous data with normal distribution will be tested with paired or unpaired t tests, non-normally distributed data using Mann–Whitney U test and Wilcoxon rank-sum test for unpaired and paired results, respectively.

Changes in biomarkers over time will be tested using analysis of variance (ANOVA) on repeated measurements. Categorical data will be tested using Chi-square test and Chi-square test for trend. Data will be presented as mean  $\pm$  standard deviation when normally distributed and as median [interquartile ranges] in case of abnormal distribution. A  $p < 0.05$  will be considered statistically significant for all tests.

## REFERENCES

1. Bijker JB, Persoon S, Peelen LM, Moons KG, Kalkman CJ, Kappelle LJ, et al. Intraoperative hypotension and perioperative ischemic stroke after general surgery: a nested case-control study. *Anesthesiology*. 2012;116(3):658-64.
2. Salmasi V, Maheshwari K, Yang D, Mascha EJ, Singh A, Sessler DI, et al. Relationship between Intraoperative Hypotension, Defined by Either Reduction from Baseline or Absolute Thresholds, and Acute Kidney and Myocardial Injury after Noncardiac Surgery: A Retrospective Cohort Analysis. *Anesthesiology*. 2016.
3. Sun LY, Wijeyesundera DN, Tait GA, Beattie WS. Association of intraoperative hypotension with acute kidney injury after elective noncardiac surgery. *Anesthesiology*. 2015;123(3):515- 23.
4. Walsh M, Devereaux PJ, Garg AX, Kurz A, Turan A, Rodseth RN, et al. Relationship between intraoperative mean arterial pressure and clinical outcomes after noncardiac surgery: toward an empirical definition of hypotension. *Anesthesiology*. 2013;119(3):507-15.
5. Veelo D ZJ, Settels J, Hatib F, Hollmann M, Geerts B. Prediction of Hypotensive Episodes With Noninvasive Continuous Waveform Analysis. *ASA Abstract*, A3053 2016.
6. Geerts BF LC, Settels JJ, Hatib F, Hollmann MW, Veelo DP. Noninvasive continuous blood pressure monitoring facilitates earlier detection of hypotensive events during surgery. *ASA Abstract*, 2016.
7. Serpero LD, Bellissima V, Colivicchi M, Sabatini M, Frigiola A, Ricotti A, Ghiglione V, Strozzi MC, Li Volti G, Galvano F, Gazzolo D. Next generation

biomarkers for brain injury. *J Matern Fetal Neonatal Med.* 2013 Oct;26 Suppl 2:44-9.

8. Adamcova M, Popelova-Lencova O, Jirkovsky E, Simko F, Gersl V, Sterba M. Cardiac troponins--Translational biomarkers in cardiology: Theory and practice of cardiac troponin high-sensitivity assays. *Biofactors.* 2016 Mar-Apr;42(2):133-48.

9. Moledina DG, Hall IE, Thiessen-Philbrook H, Reese PP, Weng FL, Schröppel B, Doshi MD, Wilson FP, Coca SG, Parikh CR. Performance of Serum Creatinine and Kidney Injury Biomarkers for Diagnosing Histologic Acute Tubular Injury. *Am J Kidney Dis.* 2017 Dec;70(6):807-816.

10. Abraham NG, Rezzani R, Rodella L, Kruger A, Taller D, Li Volti G, Goodman AI, Kappas A. Overexpression of human heme oxygenase-1 attenuates endothelial cell sloughing in experimental diabetes. *Am J Physiol Heart Circ Physiol.* 2004 Dec;287(6):H2468-77.

11. Donati M, Brancato G, Grosso G, Li Volti G, La Camera G, Cardì F, Basile F, Donati A. Immunological reaction and oxidative stress after light or heavy polypropylene mesh implantation in inguinal hernioplasty: A CONSORT prospective, randomized, clinical trial. *Medicine (Baltimore).* 2016 Jun;95(24):e3791.
